# Supplementary material for: Activating the regenerative potential of Müller glia cells in a regeneration-deficient retina
Source: eLife journal article supplement (doi:10.7554/elife.32319), 2018-01-29
Supplement: supp [file elife-32319-supp-v1.zip]

Archive with 14 entries (14 files):
- elife_poa_e32319_Figure_3_video_1.avi
- elife_poa_e32319_Figure_2_video_2.avi
- elife_poa_e32319_Figure_1_figure_supplement_3.tif
- elife_poa_e32319_Figure_2_video_1.avi
- elife_poa_e32319_Figure_1_figure_supplement_1.tif
- elife_poa_e32319_Figure_1_figure_supplement_4.tif
- elife_poa_e32319_Figure_5_figure_supplement_2.tif
- elife_poa_e32319_Figure_5_figure_supplement_1.tif
- elife_poa_e32319_Figure_2_figure_supplement_2.tif
- elife_poa_e32319_Figure_2_figure_supplement_1.tif
- elife_poa_e32319_Figure_4_figure_supplement_1.tif
- elife_poa_e32319_Figure_4_video_1.avi
- elife_poa_e32319_Figure_1_figure_supplement_2.tif
- elife_poa_e32319_Transparent_Reporting_File.pdf
