# Supplementary figures and images for: Activating the regenerative potential of Müller glia cells in a regeneration-deficient retina
Source: eLife journal article supplement (doi:10.7554/elife.32319), 2018-01-29

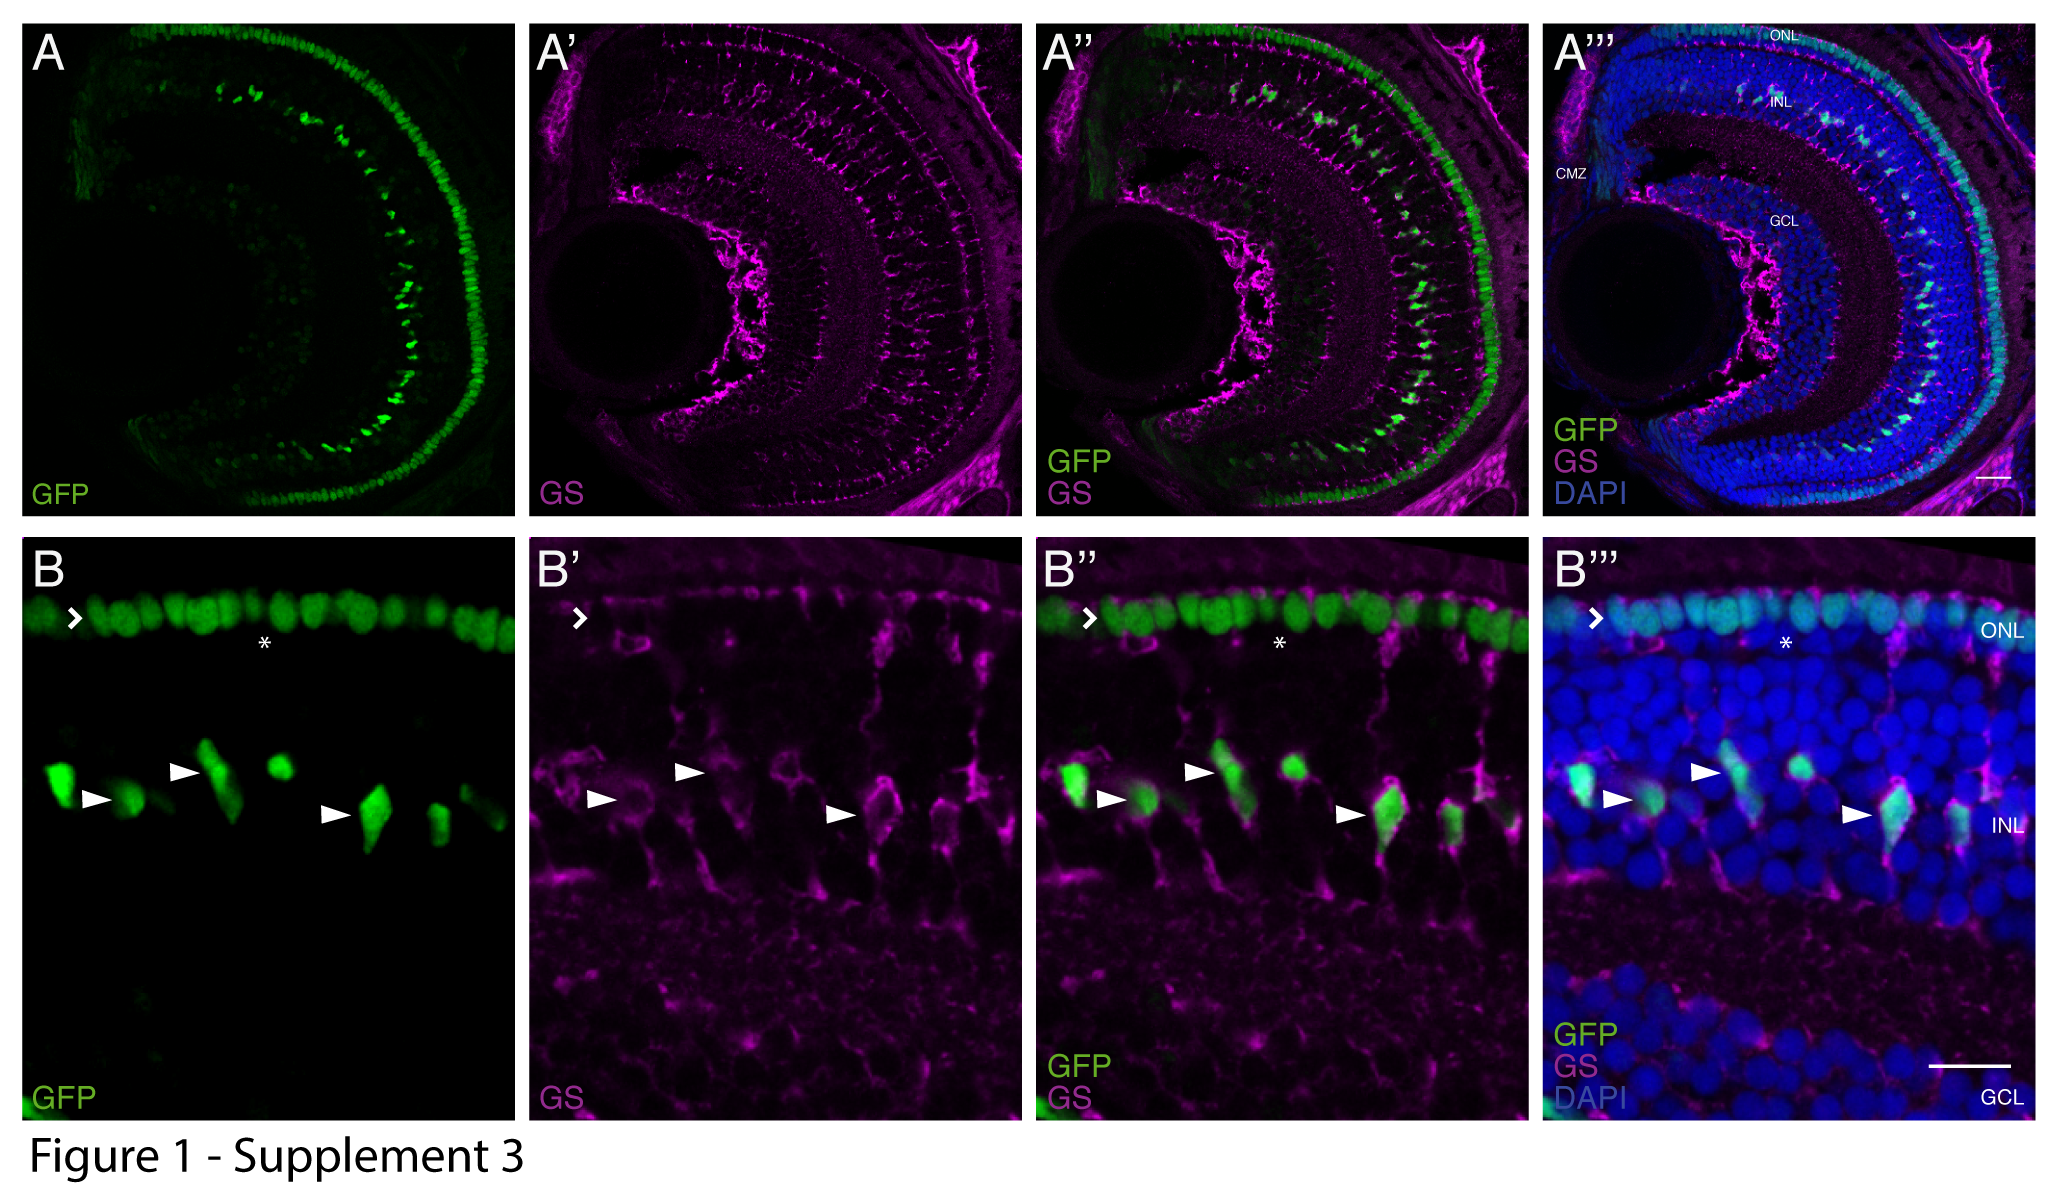

Supplement: supp [file elife-32319-supp-v1.zip › elife_poa_e32319_Figure_1_figure_supplement_3.tif]

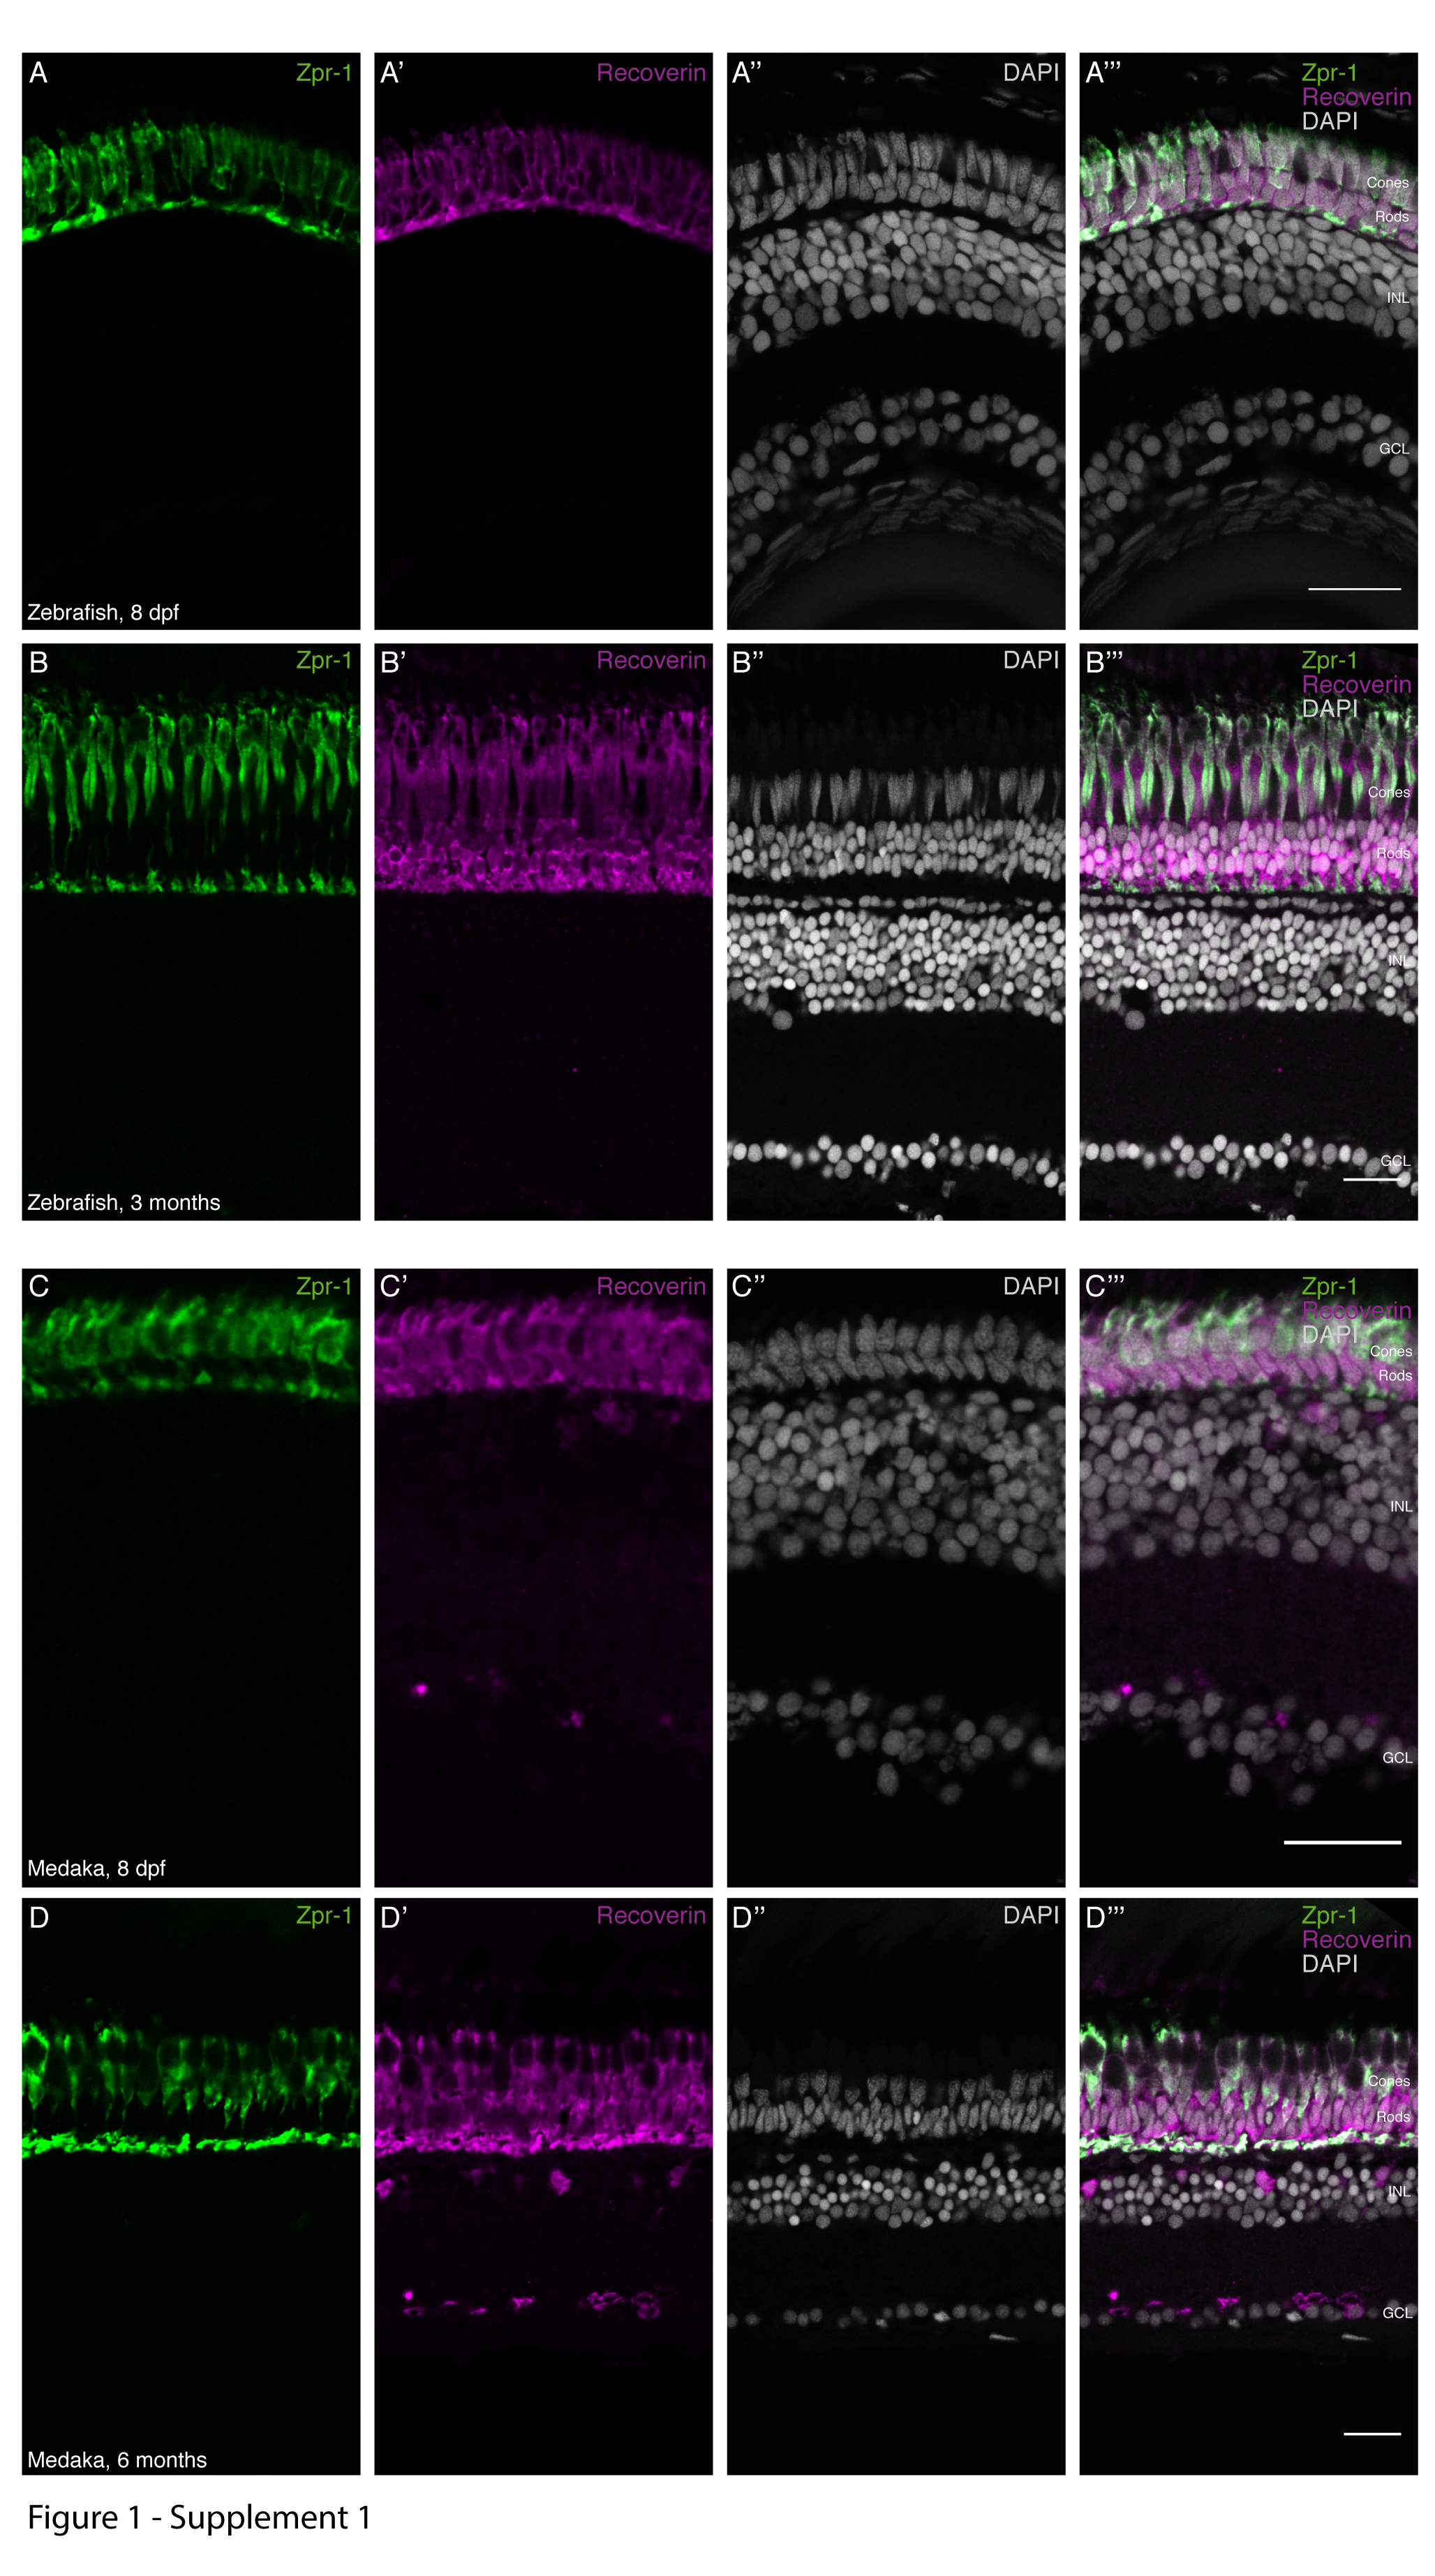

Supplement: supp [file elife-32319-supp-v1.zip › elife_poa_e32319_Figure_1_figure_supplement_1.tif]

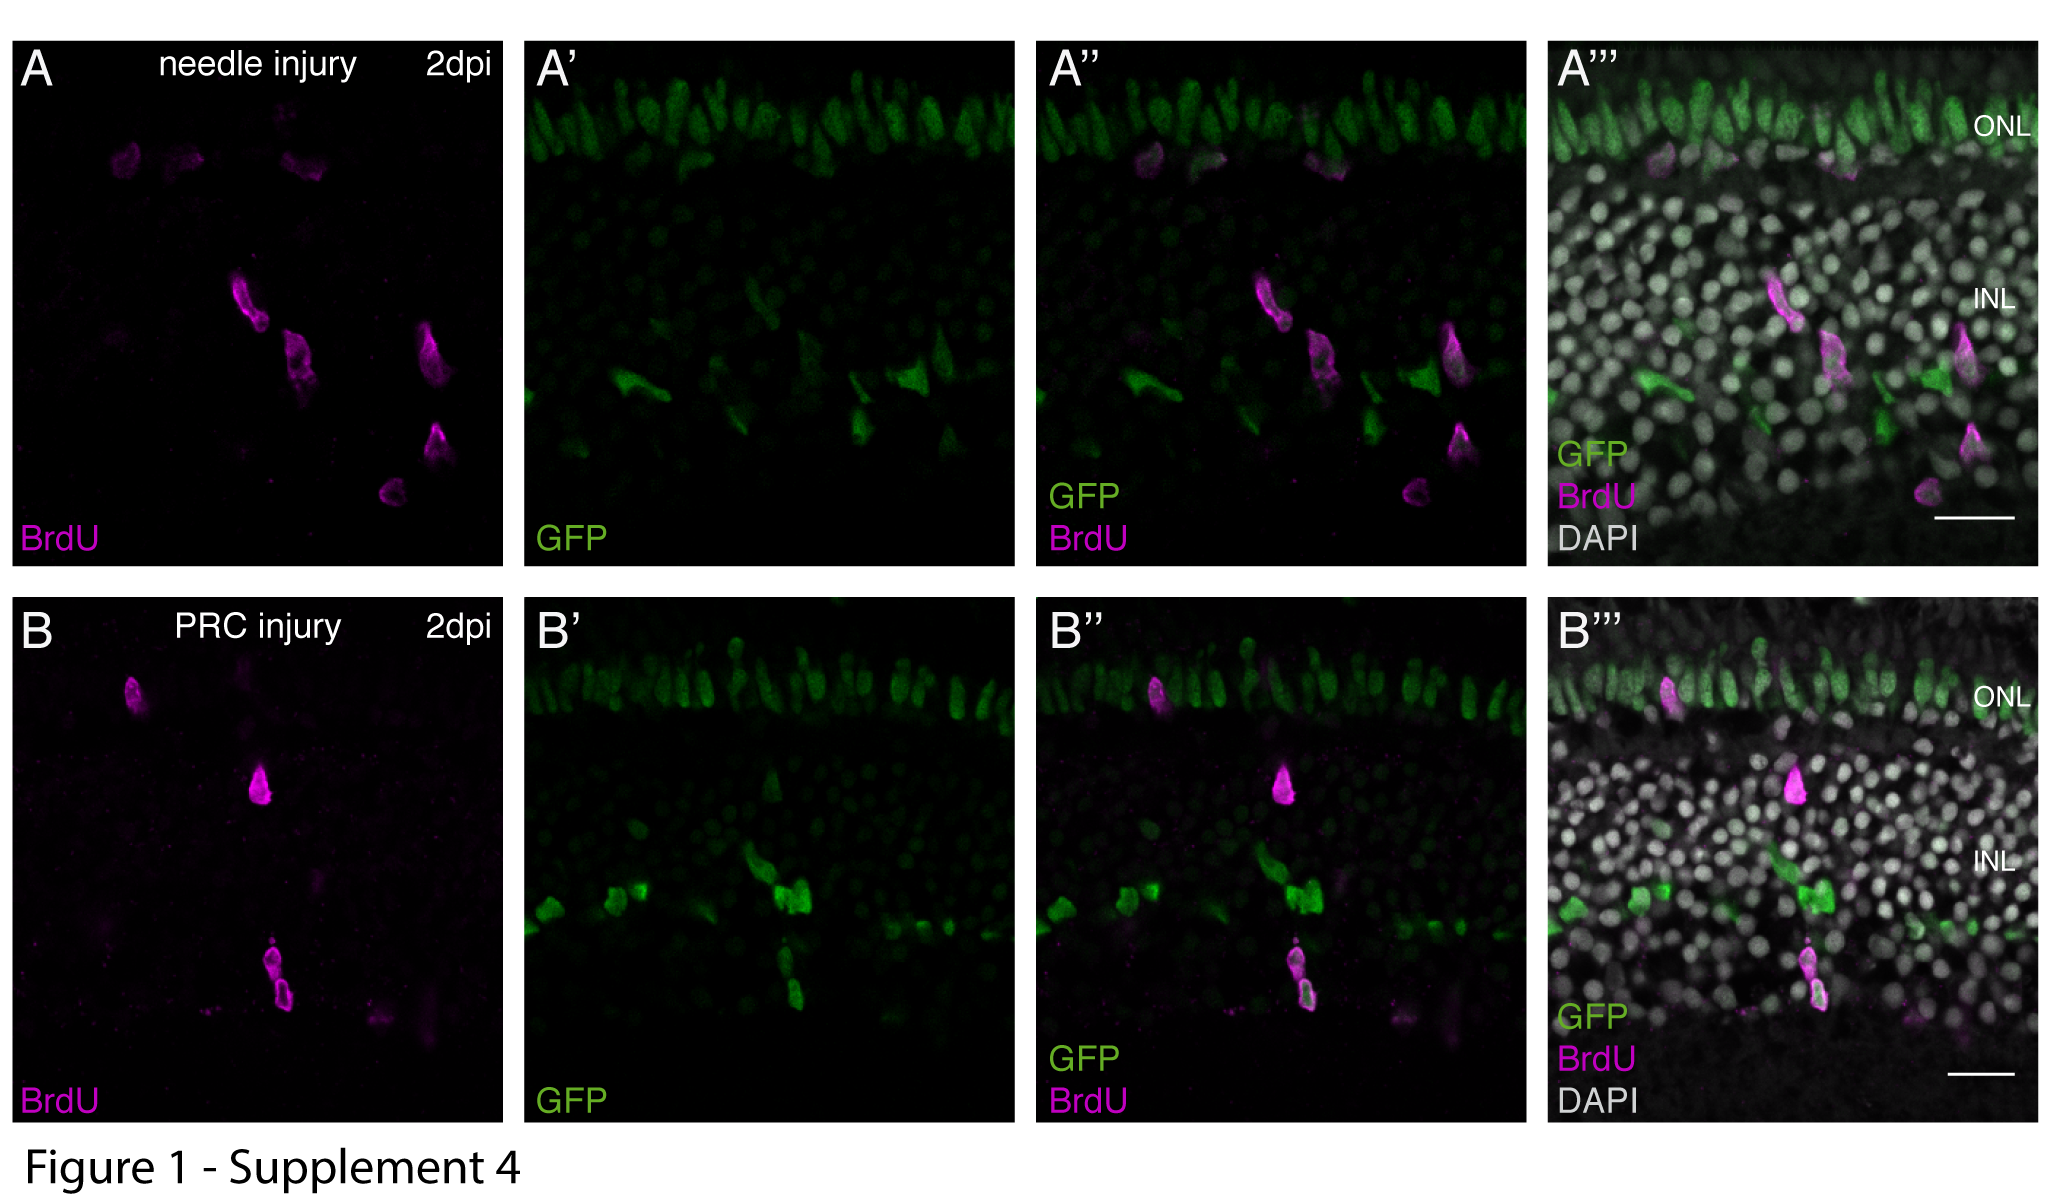

Supplement: supp [file elife-32319-supp-v1.zip › elife_poa_e32319_Figure_1_figure_supplement_4.tif]

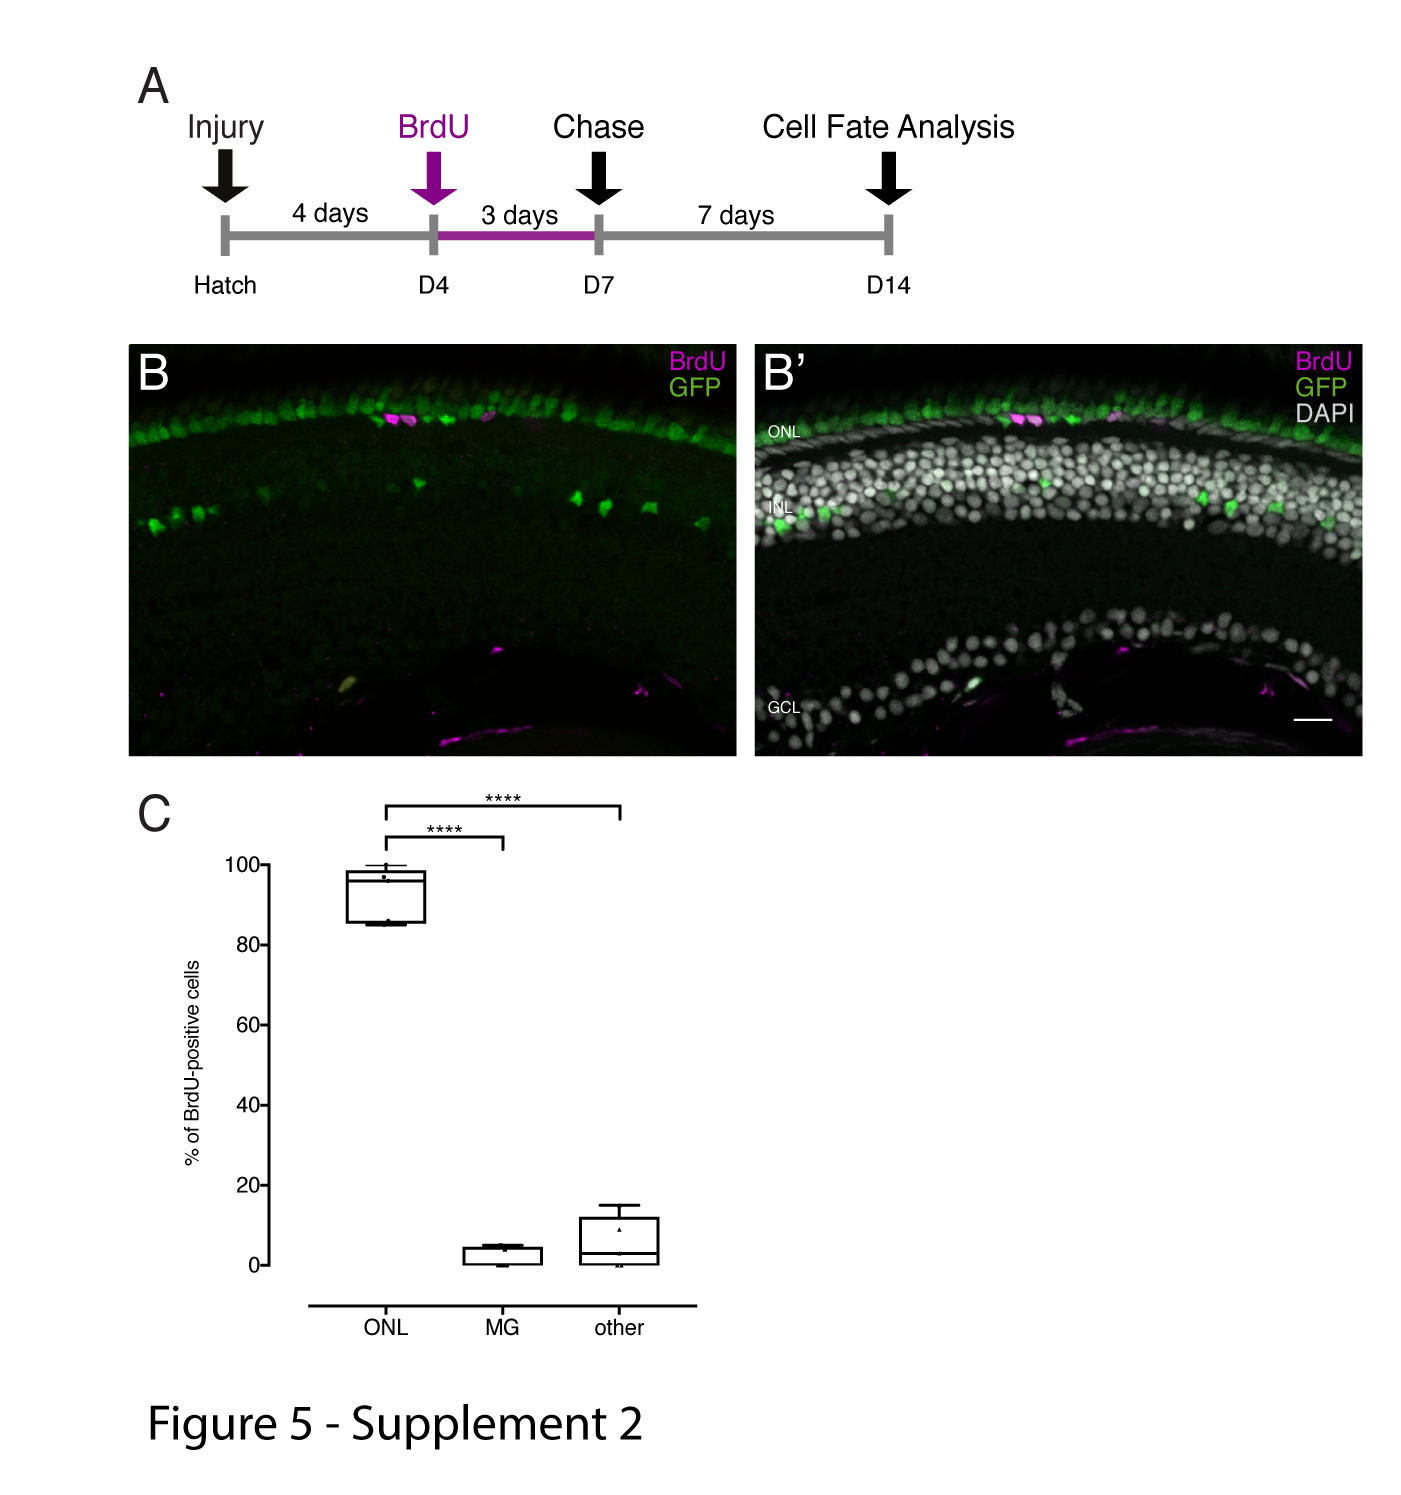

Supplement: supp [file elife-32319-supp-v1.zip › elife_poa_e32319_Figure_5_figure_supplement_2.tif]

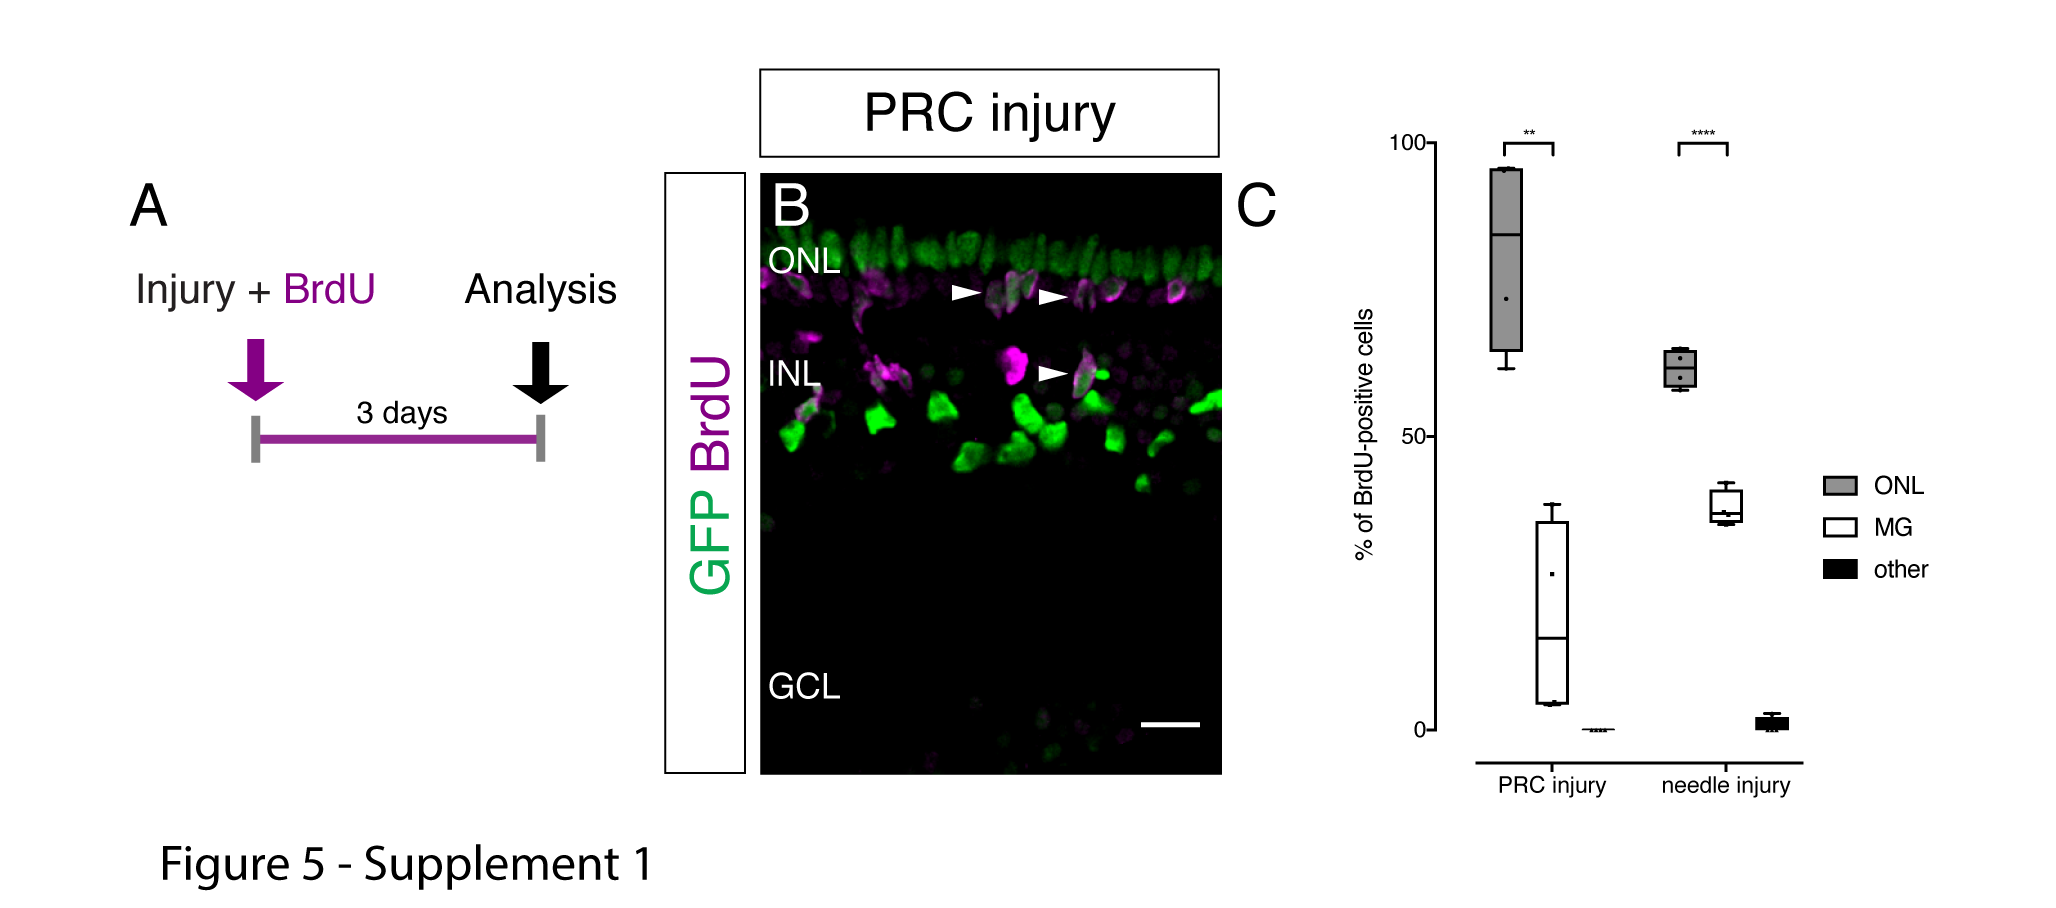

Supplement: supp [file elife-32319-supp-v1.zip › elife_poa_e32319_Figure_5_figure_supplement_1.tif]

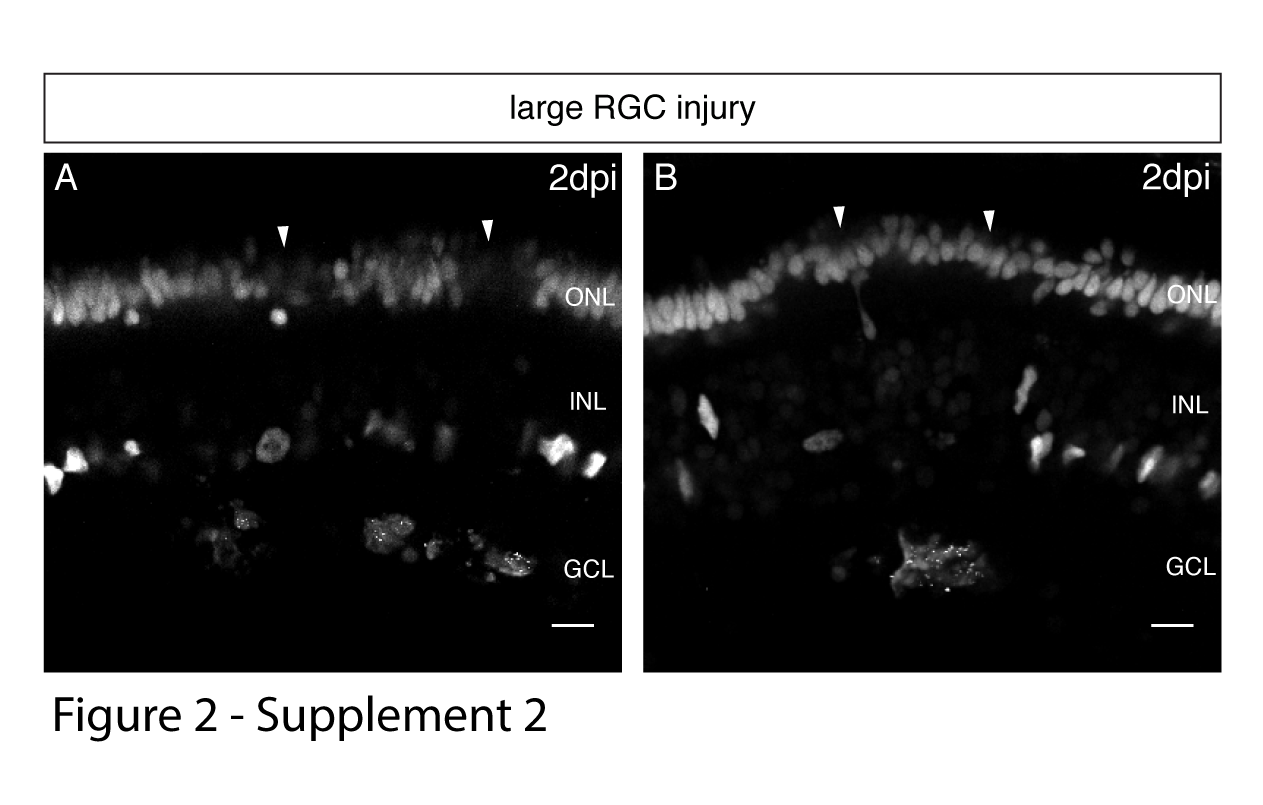

Supplement: supp [file elife-32319-supp-v1.zip › elife_poa_e32319_Figure_2_figure_supplement_2.tif]

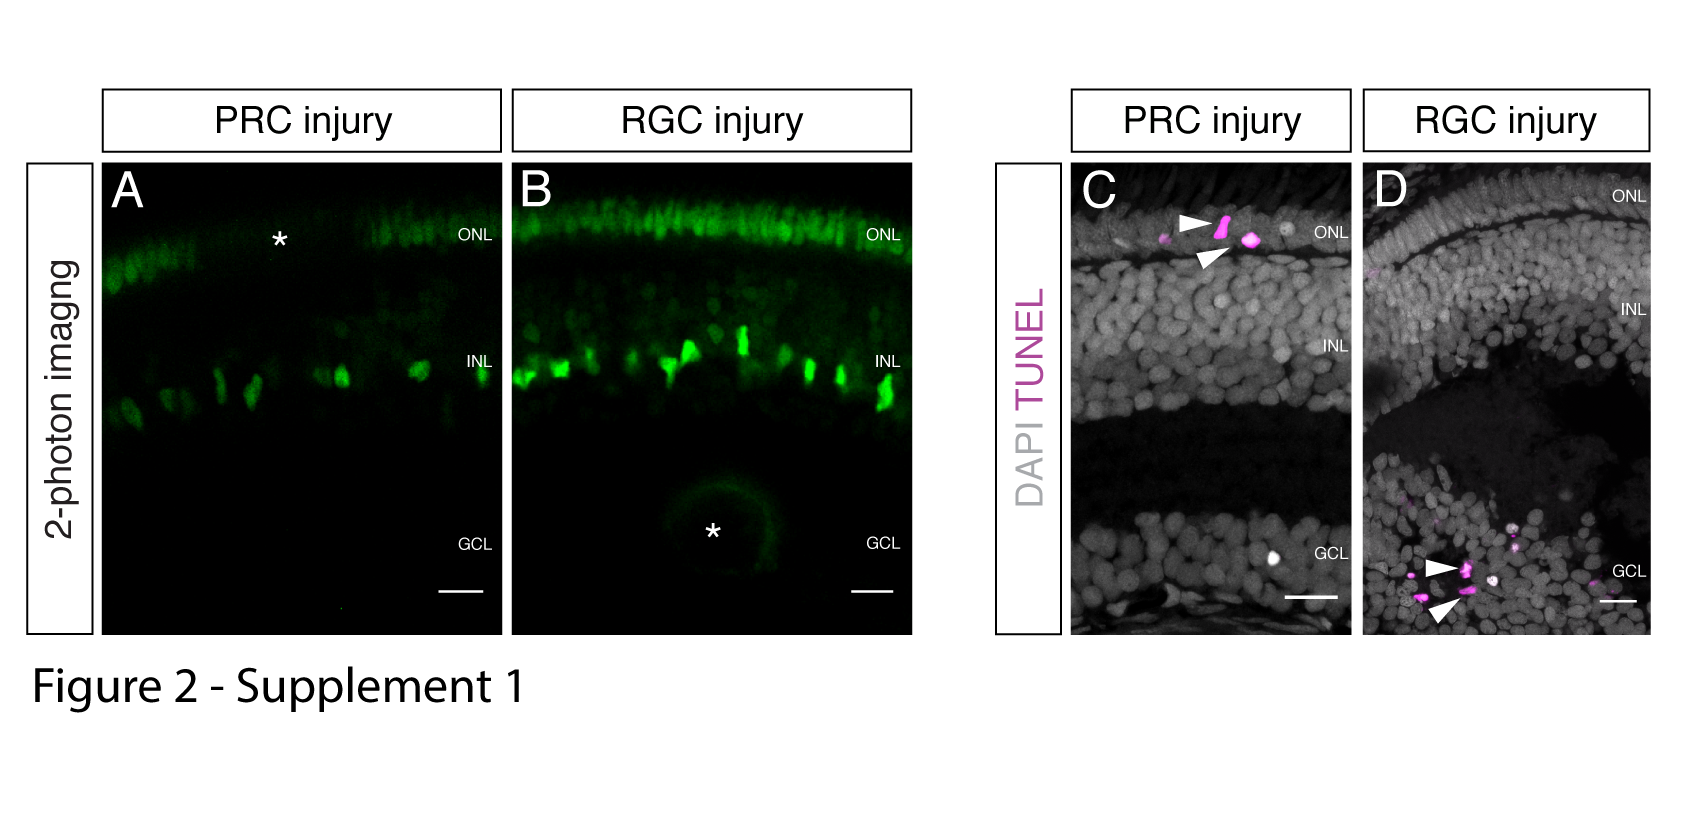

Supplement: supp [file elife-32319-supp-v1.zip › elife_poa_e32319_Figure_2_figure_supplement_1.tif]

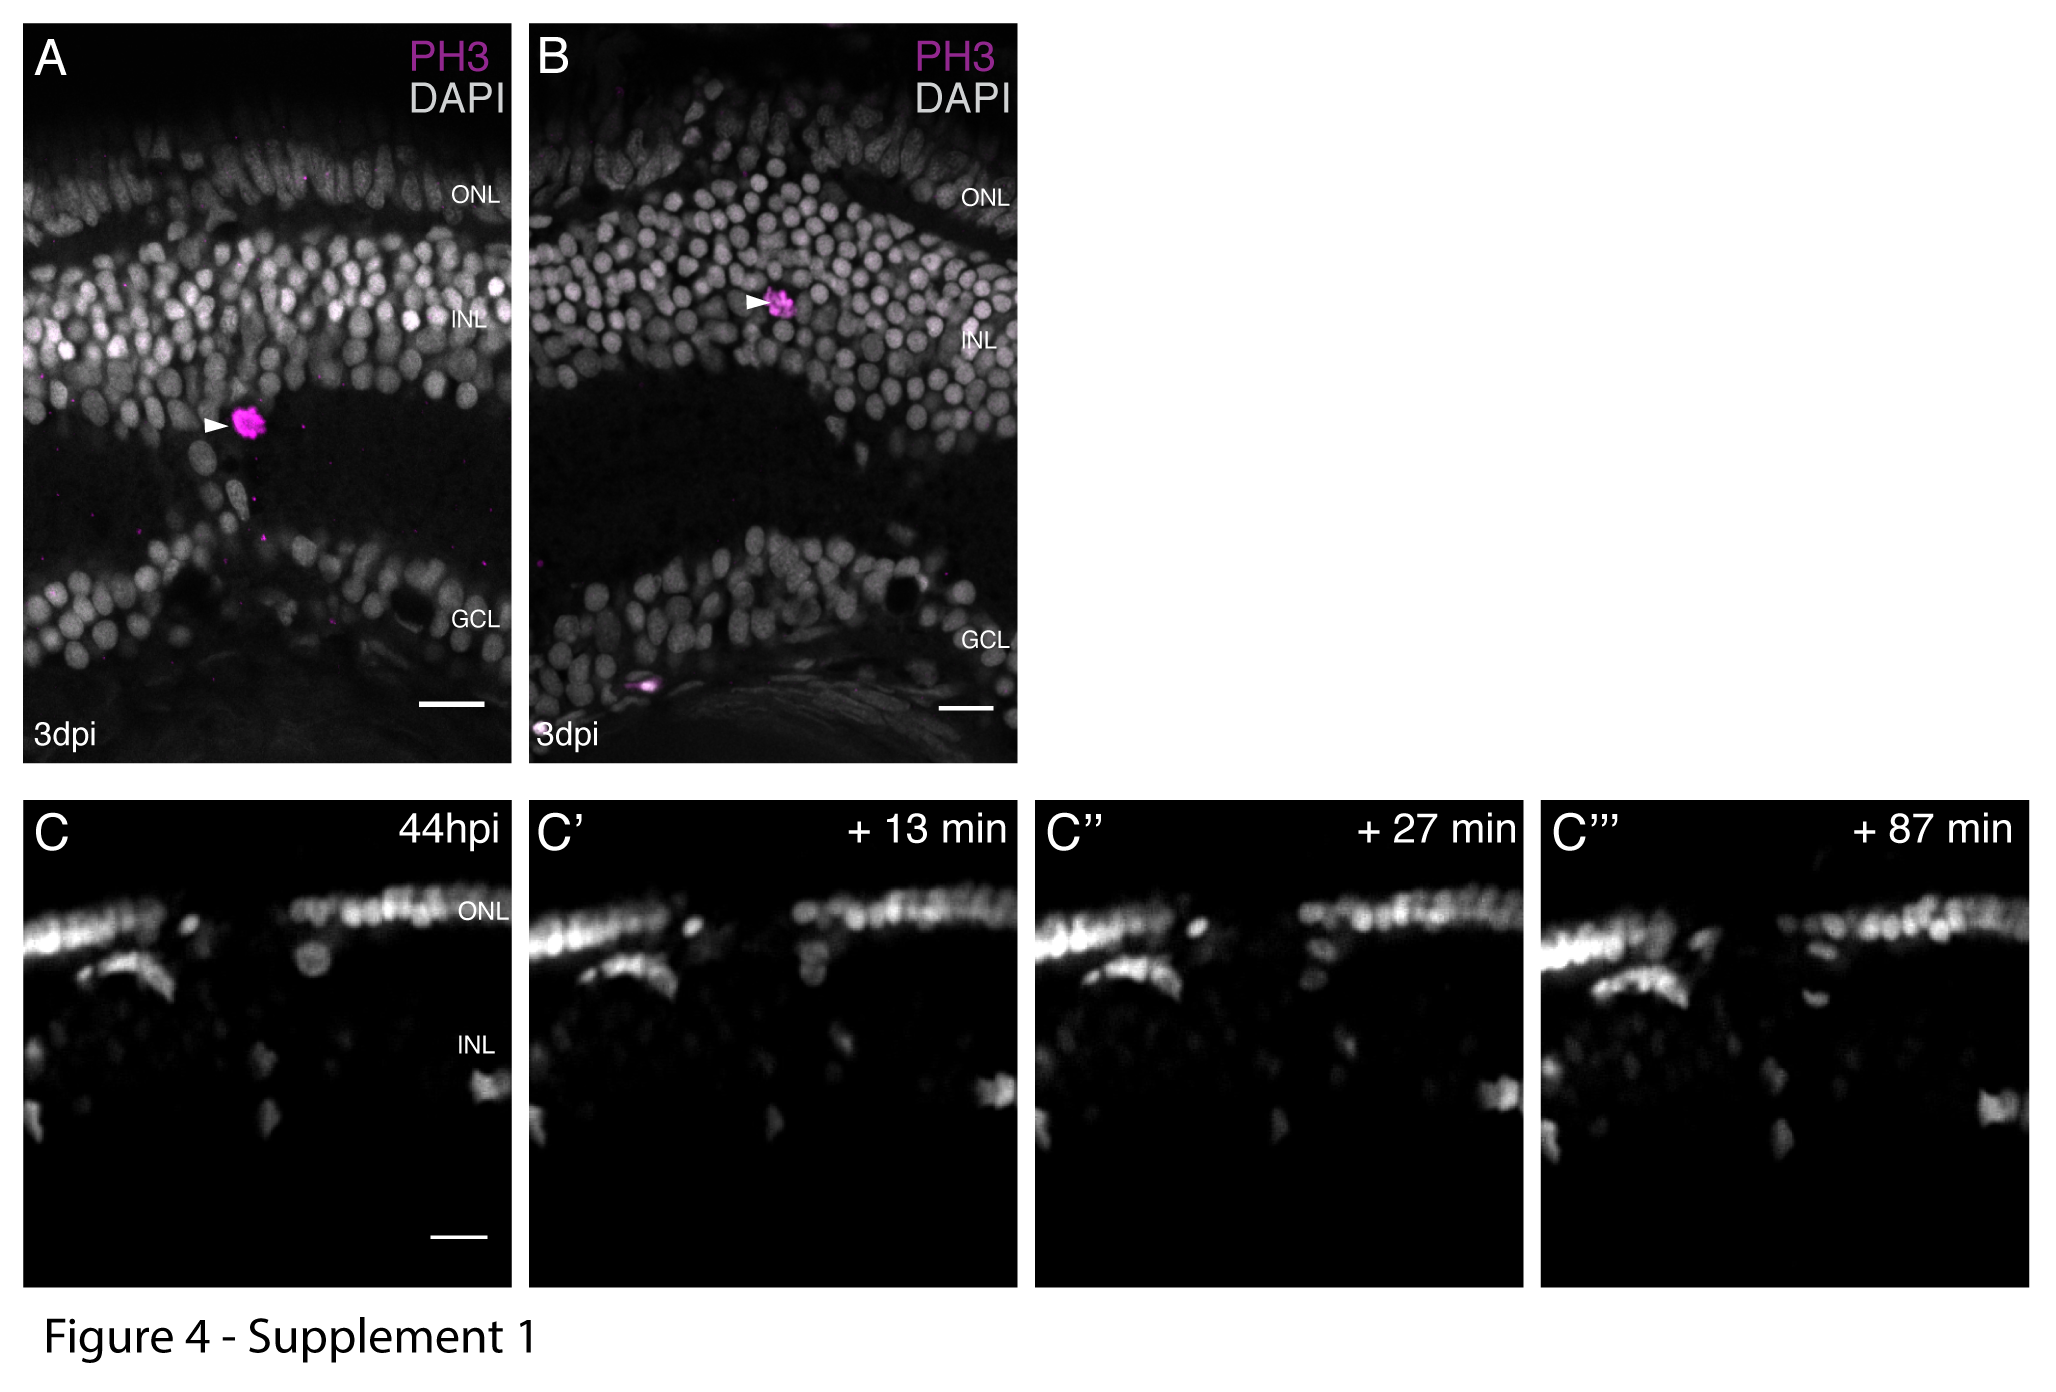

Supplement: supp [file elife-32319-supp-v1.zip › elife_poa_e32319_Figure_4_figure_supplement_1.tif]

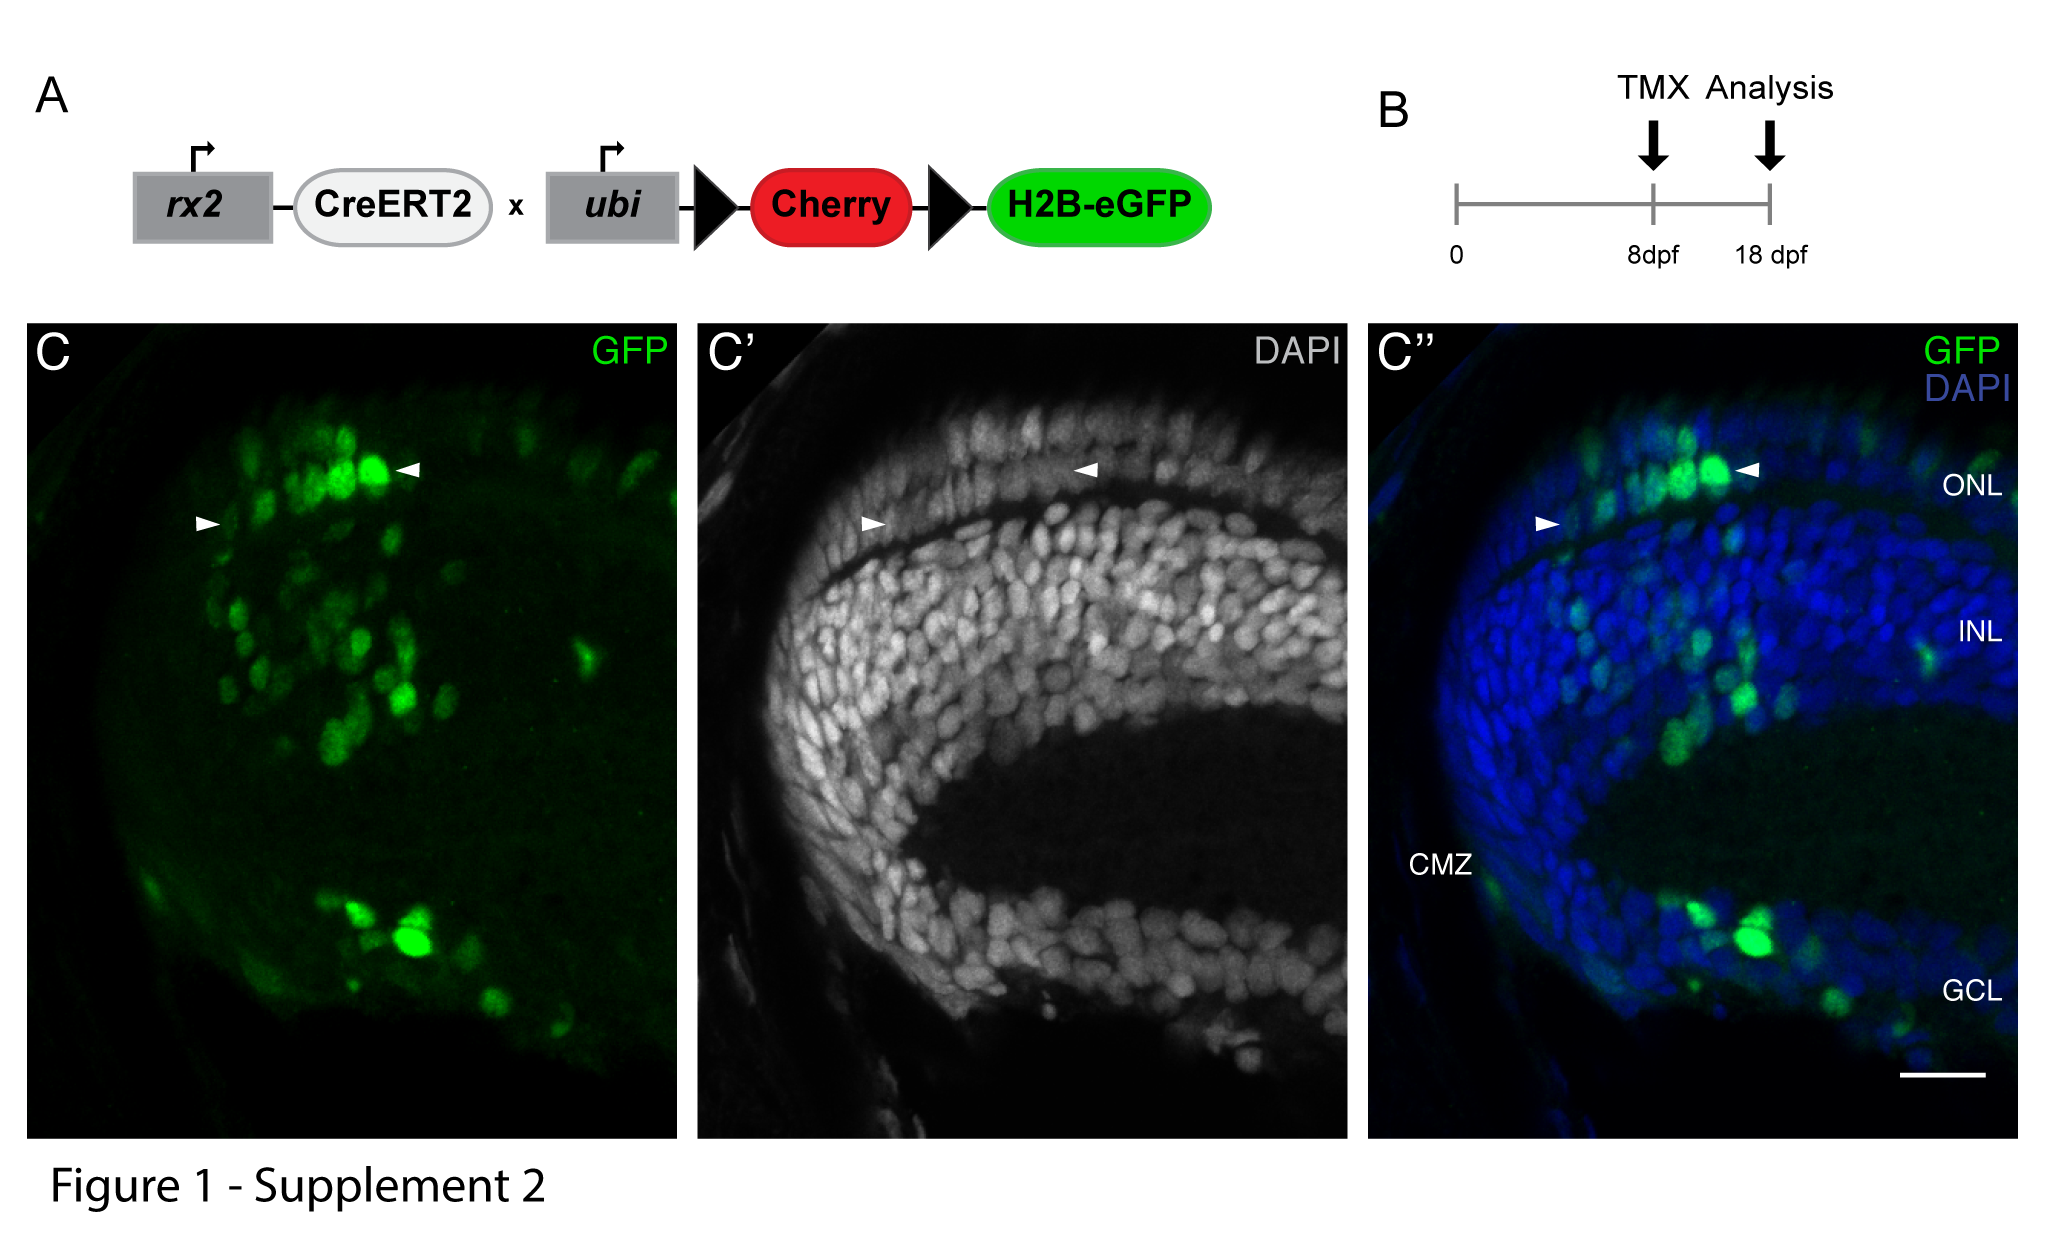

Supplement: supp [file elife-32319-supp-v1.zip › elife_poa_e32319_Figure_1_figure_supplement_2.tif]
